# Supplementary material
Source: PubMed Central journal article supplement (PMC3055752)
Supplement: supp_51.12.6196_10-5452sup.pdf [file supp_51.12.6196_10-5452sup.pdf]

Supplemental Figures and Tables

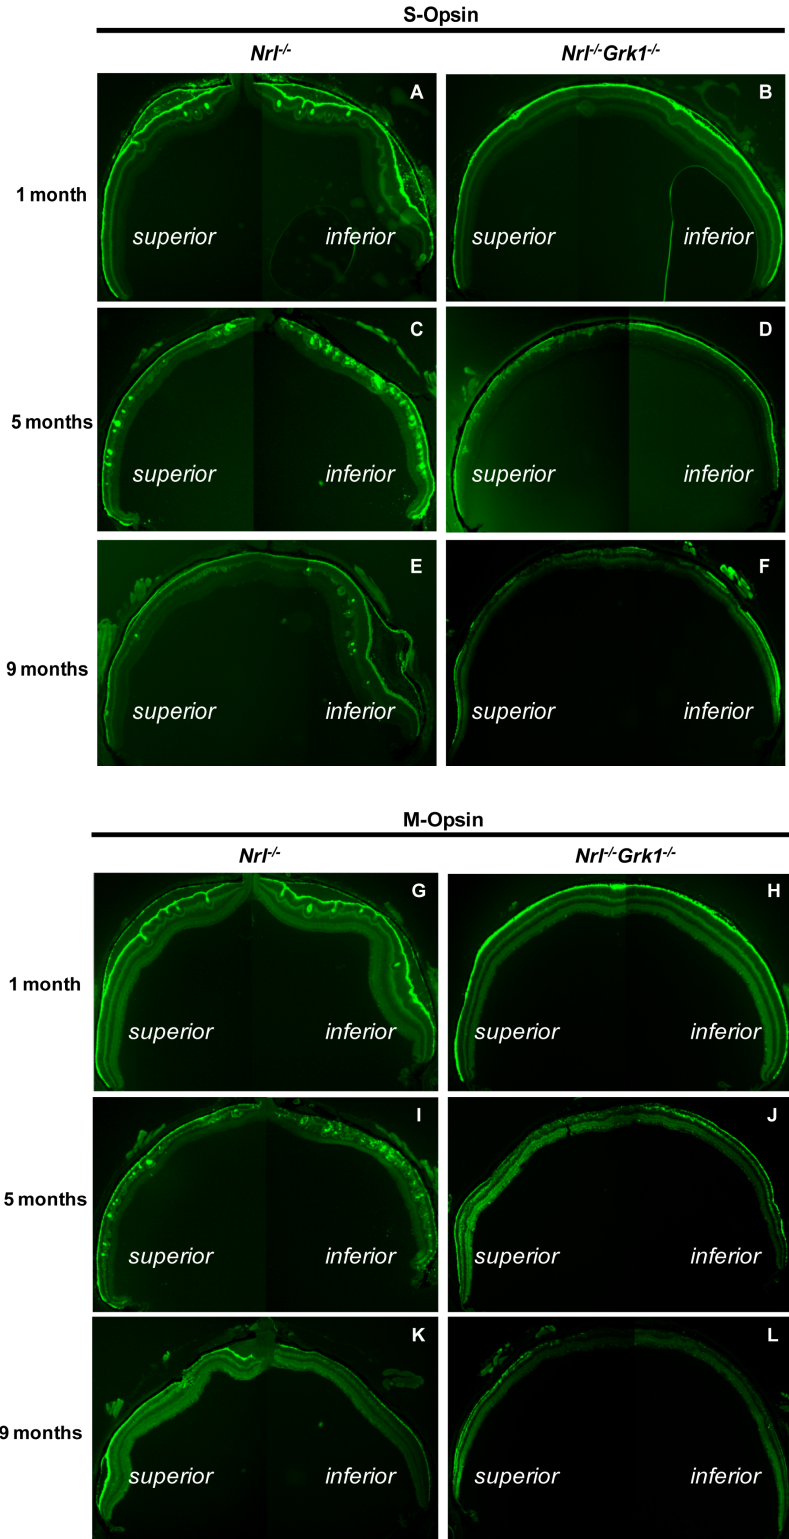

**Figure S1: Both S-opsin (A-F) and M-opsin (G-L) Expressing Cones Degenerate in the *Nrl<sup>-/-</sup>Grk1<sup>-/-</sup>*.** Mice were born and maintained throughout their lifespan in total darkness. Mice at the age of 1, 5 and 9 months were killed, and their eyes were fixed as described in Figure 1. Photographs of the superior and inferior halves of the retinal section were taken separately at lower magnification (5×10). The superior and inferior halves of the same section were then aligned to assemble the entire cross section.

**Table S1: Biological Pathways Identified as Statistically Significant**

| <b>Biological Pathways Identified as Statistically Significant</b> |                   |                    |
|--------------------------------------------------------------------|-------------------|--------------------|
| <b>Diseases and Disorders</b>                                      |                   |                    |
| <i>Name</i>                                                        | <i>p-value</i>    | <i># Molecules</i> |
| Neurological Disease                                               | 5.54E05-3.80D-02  | 108                |
| Metabolic Disease                                                  | 8.18E-08-2.27E-02 | 79                 |
| Genetic Disease                                                    | 1.98E-04-3.80E-02 | 156                |
| Cardiovascular Disease                                             | 3.03E-04-3.80E-02 | 70                 |
| Endocrine System Disorders                                         | 3.36E-04-3.69E-02 | 68                 |
| <b>Molecular and Cellular Functions</b>                            |                   |                    |
| <i>Name</i>                                                        | <i>p-value</i>    | <i># Molecules</i> |
| Cell Signaling                                                     | 1.40E-04-2.24E-02 | 20                 |
| Cell morphology                                                    | 2.07E-04-3.80E-02 | 40                 |
| Cellular Assembly and Organization                                 | 2.07E-04-3.80E-02 | 43                 |
| Cell-To-Cell Signaling and Interaction                             | 3.29E-04-3.80E-02 | 35                 |
| Cell Death                                                         | 3.67E-04-3.80E-02 | 68                 |
| <b>Physiological System Development and Function</b>               |                   |                    |
| <i>Name</i>                                                        | <i>p-value</i>    | <i># Molecules</i> |
| Nervous System Development and Function                            | 2.07E-04-3.80E-02 | 26                 |
| Embryonic Development                                              | 3.67E-04-3.80E-02 | 17                 |
| Tissue Morphology                                                  | 3.67E-04-3.80E-02 | 14                 |
| Renal and Urological System Development and Function               | 1.35E-03-3.80E-02 | 10                 |
| Connective Tissue Development and Function                         | 1.65E-03-3.80E-02 | 23                 |

**Table S2: Associated Functions of Top Networks**

| <b>Associated Functions of Top Networks</b>               |              |
|-----------------------------------------------------------|--------------|
| <i>Name</i>                                               | <i>Score</i> |
| Cell Signaling, Cell Cycle, Cellular Movement             | 41           |
| Renal and Urological System Development and Function      | 39           |
| <b><i>Inflammatory Disease, Inflammatory Response</i></b> | <b>37</b>    |
| Cellular Assembly and Organization                        | 34           |
| Cellular Compromise, Cell Cycle                           | 25           |

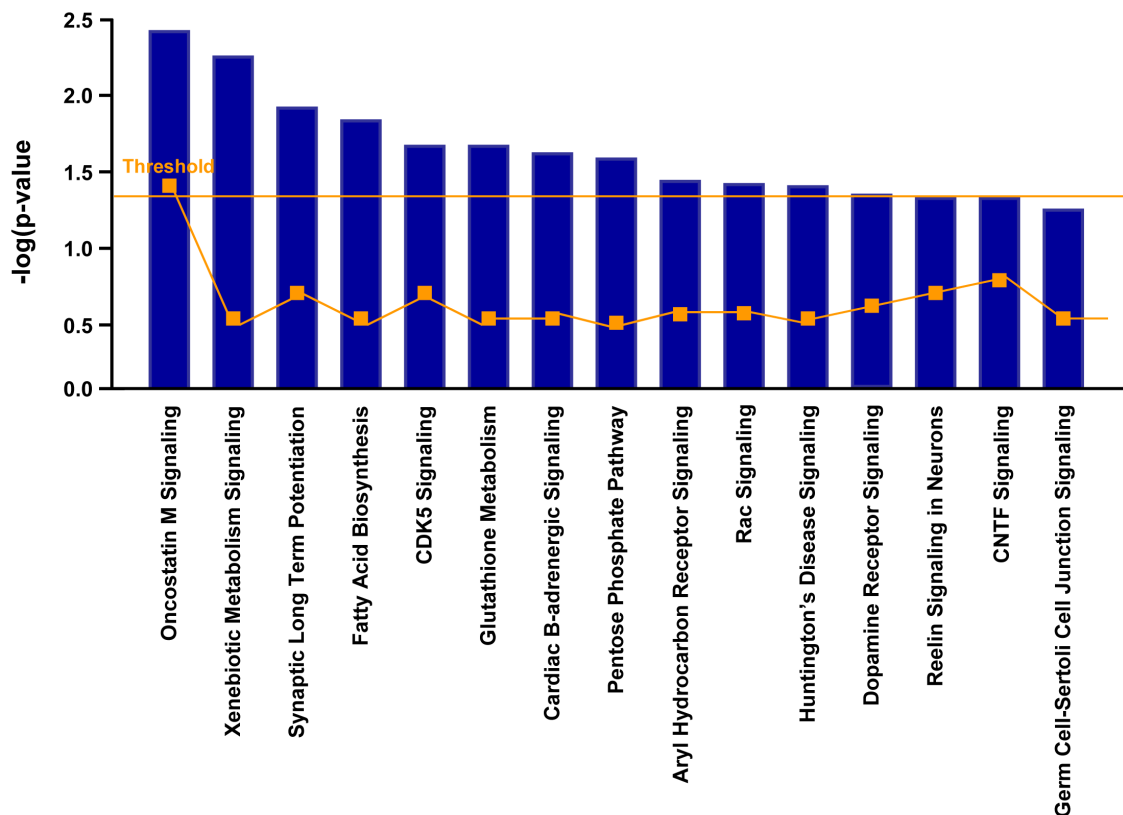

**Figure S2: Top Canonical Pathways Identified by IPA.** Canonical pathways are presented on the x axis, and the statistical significance of each pathway with a threshold of 0.05 is presented on the y axis. Canonical pathways above and just below the threshold value are presented. The orange line displays the ratio of up-regulated transcripts in the data set to the number of genes in each pathway; revealing Oncostatin M Signaling to have the largest ratio, while Synaptic Long Term Potentiation, CDK5 Signaling, and Rac Signaling among others, are above threshold for statistical significance.

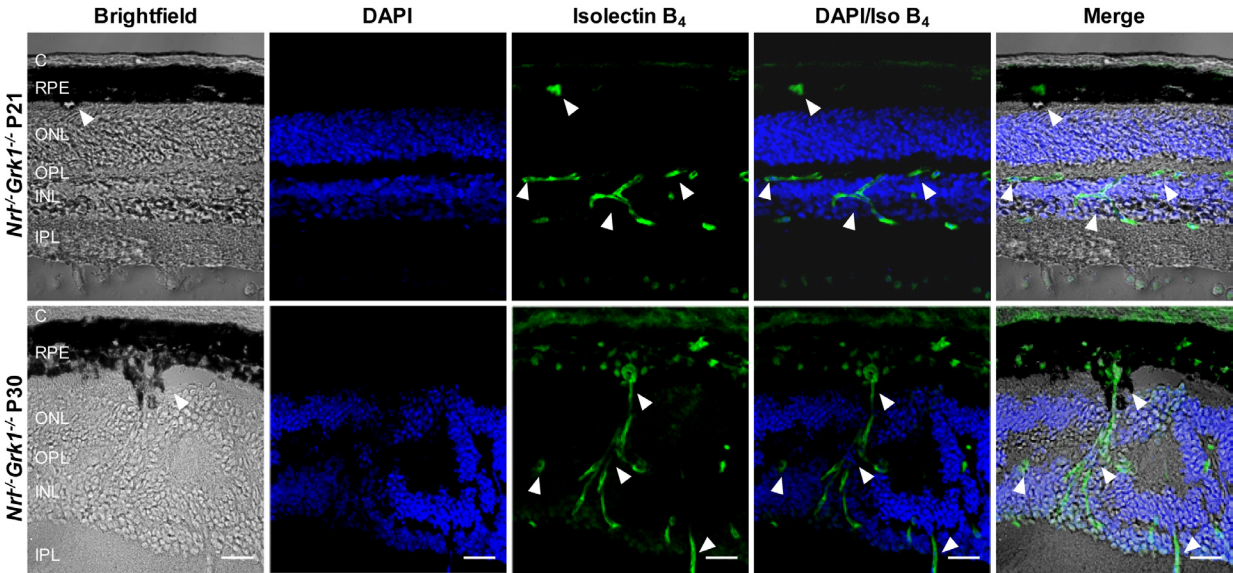

**Figure S3: Retinal Anastomoses in *Nrl<sup>-/-</sup>Grk1<sup>-/-</sup>* Mice are Present Beginning at Post Natal Age (PN) 21.** Retinas were harvested from PN21 (top panel) and PN30 (bottom panel) *Nrl<sup>-/-</sup>Grk1<sup>-/-</sup>* mice raised in cyclic light. Brightfield pictures demonstrate changes in the RPE structure (arrows). DAPI is used as a nuclear stain (blue), and fluorescein labeled GSL I – isolectin B4 (green) show penetration of blood vessels into the retina from the RPE (arrows) in *Nrl<sup>-/-</sup>Grk1<sup>-/-</sup>*. C, choroid; RPE, retinal pigment epithelium; ONL, outer nuclear layer; OPL, outer plexiform layer; IPL, inner plexiform layer; INL, inner nuclear layer. Scale bar represents a length of 20 $\mu$ m. Images were taken with a Confocal Laser Scan microscope using a 40x lens.

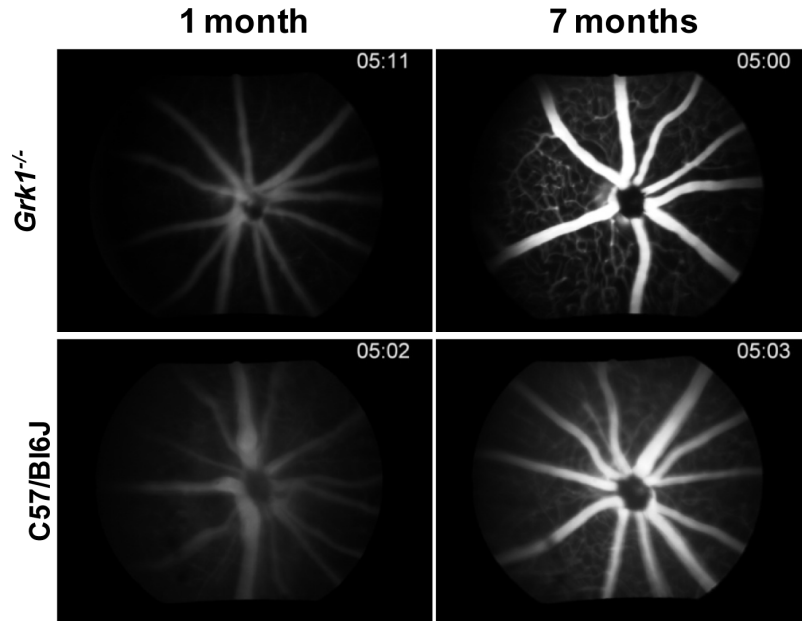

**Figure S4: Fluorescein Angiography (FA) of C57/BI6J and *Grk1*<sup>-/-</sup> Retinas.** Images were taken of the central portion of the right eye of each animal at 1 and 7 months of age. The top panel represents *Grk1*<sup>-/-</sup> mice while the bottom panel represents C57 controls. FA staining patterns show no differences in retinal vasculature between C57 and *Grk1*<sup>-/-</sup> retinas at both ages examined.

Supplement Table 3: A Comprehensive List of Differentially Expressed Genes Between *Nrl*<sup>-/-</sup> *Grk1*<sup>-/-</sup> and *Nrl*<sup>-/-</sup> Retinas

| Symbol                 | Entrez Gene Name                                                                                | ID           | p-value  | Fold Change |
|------------------------|-------------------------------------------------------------------------------------------------|--------------|----------|-------------|
| 111003J19RIK           | ribosomal protein S4, Y-linked 2                                                                | 1452730_at   | 8.63E-04 | -1.246      |
| 1700007L15RIK          | RIKEN cDNA 1700007L15 gene                                                                      | 1435403_at   | 9.44E-04 | -1.385      |
| 1700080G18RIK          | RIKEN cDNA 1700080G18 gene                                                                      | 1430055_at   | 2.73E-03 | -1.363      |
| 2010107G12RIK          | RIKEN cDNA 2010107G12 gene                                                                      | 1455449_at   | 5.28E-05 | -1.319      |
| 2310047D07RIK          | RIKEN cDNA 2310047D07 gene                                                                      | 1458587_at   | 4.04E-04 | -1.525      |
| 2310058N22RIK          | RIKEN cDNA 2310058N22 gene                                                                      | 1429215_at   | 1.35E-03 | -2.758      |
| 2810025M15RIK          | RIKEN cDNA 2810025M15 gene                                                                      | 1428452_at   | 2.03E-03 | -1.581      |
| 2810488G03RIK          | RIKEN cDNA 2810488G03 gene                                                                      | 1429068_at   | 1.74E-03 | 2.927       |
| 2900006B11RIK          | RIKEN cDNA 2900006B11 gene                                                                      | 1430253_at   | 1.07E-03 | 1.293       |
| 3100003L13RIK          | RIKEN cDNA 3100003L13 gene                                                                      | 1432065_at   | 1.12E-03 | 1.246       |
| 4632415L05RIK          | RRS1 ribosome biogenesis regulator homolog pseudogene                                           | 1419611_at   | 3.91E-03 | -4.689      |
| 4833408G04RIK          | RIKEN cDNA 4833408G04 gene                                                                      | 1454409_at   | 4.20E-03 | 6.083       |
| 4932415G12RIK          | RIKEN cDNA 4932415G12 gene                                                                      | 1428376_at   | 8.22E-04 | -1.321      |
| 4933439C10RIK          | RIKEN cDNA 4933439C10 gene                                                                      | 1452696_a_at | 2.66E-03 | -1.299      |
| 4933439C20RIK          | phosphatidylserine decarboxylase, pseudogene 1                                                  | 1435353_a_at | 6.42E-05 | -3.843      |
| 5033425G24RIK          | RIKEN cDNA 5033425G24 gene                                                                      | 1430204_at   | 2.95E-04 | -1.452      |
| 5330438D12RIK          | RIKEN cDNA 5330438D12 gene                                                                      | 1437265_at   | 1.48E-03 | -1.260      |
| 5830433G22RIK          | RIKEN cDNA 5830433G22 gene                                                                      | 1431266_at   | 2.83E-03 | -2.202      |
| 5830469G19RIK          | RIKEN cDNA 5830469G19 gene                                                                      | 1430089_at   | 3.45E-03 | -1.371      |
| 6430590I03RIK          | melanoma antigen family F, 1                                                                    | 1429479_at   | 4.51E-03 | -1.578      |
| 6820431F20RIK          | cadherin 11 pseudogene                                                                          | 1452997_at   | 4.23E-04 | 2.038       |
| 6820431F20RIK          | cadherin 11 pseudogene                                                                          | 1457673_at   | 4.78E-04 | 1.521       |
| 9230114K14RIK          | RIKEN cDNA 9230114K14 gene                                                                      | 1456643_at   | 4.38E-03 | -1.223      |
| 9430027B09RIK          | RIKEN cDNA 9430027B09 gene                                                                      | 1454232_at   | 2.64E-03 | -21.358     |
| 9630005C17RIK          | RIKEN cDNA 9630005C17 gene                                                                      | 1430268_at   | 3.69E-03 | 1.837       |
| A2M                    | alpha-2-macroglobulin                                                                           | 1434719_at   | 1.91E-03 | 2.199       |
| A330076H08RIK          | RIKEN cDNA A330076H08 gene                                                                      | 1457557_at   | 1.69E-03 | 9.575       |
| A430108E01RIK          | RIKEN cDNA A430108E01 gene                                                                      | 1438049_at   | 1.84E-03 | 2.203       |
| A930004D18RIK          | RIKEN cDNA A930004D18 gene                                                                      | 1439514_at   | 2.49E-03 | 1.303       |
| A930009L07RIK          | RIKEN cDNA A930009L07 gene                                                                      | 1445124_at   | 2.33E-03 | 1.819       |
| ABCB10                 | ATP-binding cassette, sub-family B (MDR/TAP), member 10                                         | 1416403_at   | 2.15E-03 | -11.188     |
| ABHD5                  | abhydrolase domain containing 5                                                                 | 1417566_at   | 3.15E-03 | -1.843      |
| ACTG2 (includes EG:72) | actin, gamma 2, smooth muscle, enteric                                                          | 1416454_s_at | 1.29E-03 | 4.155       |
| ACTR1A                 | ARP1 actin-related protein 1 homolog A, centractin alpha (yeast)                                | 1457970_at   | 1.98E-03 | 4.016       |
| ADARB2                 | adenosine deaminase, RNA-specific, B2 (RED2 homolog rat)                                        | 1458112_at   | 1.22E-03 | 2.484       |
| ADCY8                  | adenylate cyclase 8 (brain)                                                                     | 1418754_at   | 2.04E-03 | 1.401       |
| AGA                    | aspartylglucosaminidase                                                                         | 1434665_at   | 4.10E-03 | -1.778      |
| AGBL3                  | ATP/GTP binding protein-like 3                                                                  | 1452619_a_at | 3.44E-03 | -1.312      |
| AGPAT5                 | 1-acylglycerol-3-phosphate O-acyltransferase 5 (lysophosphatidic acid acyltransferase, epsilon) | 1434287_at   | 3.70E-03 | -1.392      |
| AGTPBP1                | ATP/GTP binding protein 1                                                                       | 1418332_a_at | 5.33E-04 | 1.215       |
| AI605517               | expressed sequence AI605517                                                                     | 1457797_at   | 2.29E-03 | -6.042      |
| AIFM3                  | apoptosis-inducing factor, mitochondrion-associated, 3                                          | 1434742_s_at | 4.95E-03 | 1.308       |
| AKAP9                  | A kinase (PRKA) anchor protein (yotiao) 9                                                       | 1455151_at   | 3.47E-03 | -1.487      |
| AKR1B1                 | aldo-keto reductase family 1, member B1 (aldose reductase)                                      | 1448319_at   | 4.50E-04 | -1.356      |
| ALDH16A1               | aldehyde dehydrogenase 16 family, member A1                                                     | 1423731_at   | 6.70E-04 | -1.487      |
| ALS2                   | amyotrophic lateral sclerosis 2 (juvenile)                                                      | 1417784_at   | 9.83E-04 | -3.813      |
| AMN1                   | antagonist of mitotic exit network 1 homolog (S. cerevisiae)                                    | 1453358_s_at | 3.48E-03 | -1.311      |
| ANK1                   | ankyrin 1, erythrocytic                                                                         | 1419421_at   | 2.01E-03 | 1.296       |
| ANKRD11                | ankyrin repeat domain 11                                                                        | 1436967_at   | 1.28E-03 | 2.694       |
| ANKRD32                | ankyrin repeat domain 32                                                                        | 1423577_at   | 5.63E-04 | -1.806      |
| ANKRD6                 | ankyrin repeat domain 6                                                                         | 1437217_at   | 1.03E-03 | 1.326       |
| ANKZF1                 | ankyrin repeat and zinc finger domain containing 1                                              | 1419818_x_at | 1.56E-03 | -1.202      |
| ANXA1                  | annexin A1                                                                                      | 1448213_at   | 8.48E-04 | 1.568       |
| APC2                   | adenomatosis polyposis coli 2                                                                   | 1455231_s_at | 4.15E-03 | 1.280       |
| APCDD1                 | adenomatosis polyposis coli down-regulated 1                                                    | 1454822_x_at | 2.08E-03 | 1.279       |
| APLP1                  | amyloid beta (A4) precursor-like protein 1                                                      | 1435857_s_at | 2.69E-04 | 1.500       |
| APLP1                  | amyloid beta (A4) precursor-like protein 1                                                      | 1416134_at   | 4.97E-03 | 1.630       |
| ARFGAP1                | ADP-ribosylation factor GTPase activating protein 1                                             | 1427245_at   | 2.66E-03 | 1.265       |
| ARHGEF11               | Rho guanine nucleotide exchange factor (GEF) 11                                                 | 1434926_at   | 1.89E-04 | 1.232       |
| ARHGEF17               | Rho guanine nucleotide exchange factor (GEF) 17                                                 | 1419938_s_at | 2.14E-03 | 1.334       |
| ARL6IP1                | ADP-ribosylation factor-like 6 interacting protein 1                                            | 1423818_a_at | 3.70E-03 | 1.239       |
| ARRDC3                 | arrestin domain containing 3                                                                    | 1454617_at   | 3.36E-03 | -1.267      |
| ASF1B                  | ASF1 anti-silencing function 1 homolog B (S. cerevisiae)                                        | 1423714_at   | 2.63E-03 | 2.267       |
| ASNS                   | asparagine synthetase                                                                           | 1451095_at   | 1.47E-04 | -2.287      |
| ASNS                   | asparagine synthetase                                                                           | 1433966_x_at | 1.82E-04 | -2.168      |
| ATP1A1                 | ATPase, Na <sup>+</sup> /K <sup>+</sup> transporting, alpha 1 polypeptide                       | 1451071_a_at | 1.52E-03 | 1.219       |
| AY512938               | cDNA sequence AY512938                                                                          | 1458551_at   | 4.15E-03 | 3.468       |
| B230114P17RIK          | RIKEN cDNA B230114P17 gene                                                                      | 1456295_at   | 2.52E-03 | 1.328       |
| B830008H07RIK          | RIKEN cDNA B830008H07 gene                                                                      | 1457791_at   | 2.32E-03 | 2.341       |
| BBS10                  | Bardet-Biedl syndrome 10                                                                        | 1430170_at   | 2.46E-03 | -1.316      |
| BCAT2                  | branched chain aminotransferase 2, mitochondrial                                                | 1425764_a_at | 3.84E-03 | -1.227      |
| BPNT1                  | 3'(2'), 5'-bisphosphate nucleotidase 1                                                          | 1449211_at   | 2.92E-03 | -1.573      |
| BTRC                   | beta-transducin repeat containing                                                               | 1457305_at   | 7.75E-04 | 1.478       |
| BTRC                   | beta-transducin repeat containing                                                               | 1446925_at   | 3.65E-03 | -2.236      |
| C030014A21RIK          | RIKEN cDNA C030014A21 gene                                                                      | 1453897_at   | 1.81E-03 | 2.408       |
| C030044B11RIK          | RIKEN cDNA C030044B11 gene                                                                      | 1429264_at   | 2.25E-03 | -1.250      |
| C10ORF104              | chromosome 10 open reading frame 104                                                            | 1419994_s_at | 2.51E-03 | -1.212      |
| C11ORF87               | chromosome 11 open reading frame 87                                                             | 1444026_at   | 3.17E-04 | 1.551       |
| C12ORF4                | chromosome 12 open reading frame 4                                                              | 1449437_at   | 2.96E-03 | -1.247      |
| C14ORF149              | chromosome 14 open reading frame 149                                                            | 1424692_at   | 4.71E-03 | -2.204      |
| C16ORF80               | chromosome 16 open reading frame 80                                                             | 1419462_s_at | 2.15E-04 | -1.204      |
| C19ORF2                | chromosome 19 open reading frame 2                                                              | 1433913_at   | 2.96E-03 | -1.727      |
| C1ORF192               | chromosome 1 open reading frame 192                                                             | 1429181_at   | 3.43E-03 | -1.449      |
| C22ORF23               | chromosome 22 open reading frame 23                                                             | 1422774_at   | 3.63E-03 | -1.454      |
| C2ORF77                | chromosome 2 open reading frame 77                                                              | 1454000_s_at | 1.71E-03 | -1.542      |
| C4ORF47                | chromosome 4 open reading frame 47                                                              | 1453168_at   | 2.31E-05 | -8.472      |
| C8ORF41                | chromosome 8 open reading frame 41                                                              | 1424361_at   | 2.63E-03 | 1.440       |

|                           |                                                                               |              |          |        |
|---------------------------|-------------------------------------------------------------------------------|--------------|----------|--------|
| C8ORF41                   | chromosome 8 open reading frame 41                                            | 1435309_at   | 3.77E-03 | -4.650 |
| C8ORF41                   | chromosome 8 open reading frame 41                                            | 1457906_at   | 4.23E-03 | -2.414 |
| C8ORF79                   | chromosome 8 open reading frame 79                                            | 1443902_at   | 1.94E-03 | 2.426  |
| C9ORF21                   | chromosome 9 open reading frame 21                                            | 1434441_at   | 2.42E-04 | -1.858 |
| C9ORF46                   | chromosome 9 open reading frame 46                                            | 1460361_at   | 1.12E-03 | -1.418 |
| CADM1                     | cell adhesion molecule 1                                                      | 1417378_at   | 1.56E-03 | 1.250  |
| CADPS2                    | Ca++-dependent secretion activator 2                                          | 1451499_at   | 6.48E-04 | 1.815  |
| CAMK2G                    | calcium/calmodulin-dependent protein kinase II gamma                          | 1423942_a_at | 1.22E-04 | 1.264  |
| CAP1                      | CAP, adenylate cyclase-associated protein 1 (yeast)                           | 1417461_at   | 2.39E-05 | 32.933 |
| CAP1                      | CAP, adenylate cyclase-associated protein 1 (yeast)                           | 1417462_at   | 4.13E-05 | 23.502 |
| CAPN2                     | calpain 2, (mII) large subunit                                                | 1416257_at   | 8.03E-04 | 1.244  |
| CCDC127                   | coiled-coil domain containing 127                                             | 1455248_at   | 3.39E-03 | -1.547 |
| CCDC21                    | coiled-coil domain containing 21                                              | 1432391_at   | 5.39E-05 | -1.542 |
| CCDC51                    | coiled-coil domain containing 51                                              | 1452891_at   | 1.56E-03 | -1.507 |
| CCND2                     | cyclin D2                                                                     | 1434745_at   | 1.33E-03 | 2.400  |
| CCNG1                     | cyclin G1                                                                     | 1450017_at   | 4.97E-03 | -1.284 |
| CD44                      | CD44 molecule (Indian blood group)                                            | 1434376_at   | 2.96E-04 | 1.845  |
| CD44                      | CD44 molecule (Indian blood group)                                            | 1423760_at   | 5.54E-04 | 1.758  |
| CD47                      | CD47 molecule                                                                 | 1419554_at   | 1.30E-03 | 1.373  |
| CD99L2                    | CD99 molecule-like 2                                                          | 1456746_a_at | 3.57E-04 | -1.581 |
| CDK2A1P1                  | cyclin-dependent kinase 2 associated protein 1                                | 1435509_x_at | 4.10E-03 | -1.220 |
| CELSR2                    | cadherin, EGF LAG seven-pass G-type receptor 2 (flamingo homolog, Drosophila) | 1435336_at   | 2.31E-03 | 1.380  |
| CH3L1                     | chitinase 3-like 1 (cartilage glycoprotein-39)                                | 1451537_at   | 2.52E-04 | 1.646  |
| CHL1                      | cell adhesion molecule with homology to L1CAM (close homolog of L1)           | 1435190_at   | 4.36E-03 | 1.472  |
| CLN5                      | ceroid-lipofuscinosis, neuronal 5                                             | 1426886_at   | 4.42E-03 | -1.220 |
| CNOT6L                    | CCR4-NOT transcription complex, subunit 6-like                                | 1451723_at   | 3.23E-03 | -1.282 |
| CNTNAP4                   | contactin associated protein-like 4                                           | 1419044_at   | 9.64E-04 | 1.422  |
| COL4A2                    | collagen, type IV, alpha 2                                                    | 1424051_at   | 3.01E-03 | 1.454  |
| COPG2                     | coatamer protein complex, subunit gamma 2                                     | 1448761_a_at | 2.59E-03 | -1.304 |
| CPNE8                     | copine VIII                                                                   | 1431146_a_at | 2.87E-03 | 1.467  |
| CPSF2                     | cleavage and polyadenylation specific factor 2, 100kDa                        | 1431089_at   | 2.32E-03 | -1.264 |
| CRB1                      | crumbs homolog 1 (Drosophila)                                                 | 1441330_at   | 1.03E-03 | -6.324 |
| CSF1R                     | colony stimulating factor 1 receptor                                          | 1419873_s_at | 1.73E-03 | 1.354  |
| CSF1R                     | colony stimulating factor 1 receptor                                          | 1419872_at   | 4.94E-03 | 1.589  |
| CTSH                      | cathepsin H                                                                   | 1443814_x_at | 1.54E-03 | 1.359  |
| CWC22                     | CWC22 spliceosome-associated protein homolog (S. cerevisiae)                  | 1424607_a_at | 2.17E-03 | -1.917 |
| CWC22                     | CWC22 spliceosome-associated protein homolog (S. cerevisiae)                  | 1424609_a_at | 3.58E-03 | -1.875 |
| CYP26A1                   | cytochrome P450, family 26, subfamily A, polypeptide 1                        | 1419430_at   | 1.80E-03 | 3.374  |
| DAG1                      | dystroglycan 1 (dystrophin-associated glycoprotein 1)                         | 1456131_x_at | 2.87E-03 | 1.360  |
| DAPK1                     | death-associated protein kinase 1                                             | 1426915_at   | 4.40E-03 | 1.703  |
| DAPK1                     | death-associated protein kinase 1                                             | 1427358_a_at | 4.73E-03 | 1.509  |
| DDC2B                     | doublecortin domain containing 2B                                             | 1444714_at   | 2.18E-03 | -9.736 |
| DCTN6                     | dynactin 6                                                                    | 1416499_a_at | 6.00E-04 | -1.342 |
| DFNB31                    | deafness, autosomal recessive 31                                              | 1436485_s_at | 2.96E-03 | -1.675 |
| DHDH                      | dihydrodiol dehydrogenase (dimeric)                                           | 1453487_at   | 1.32E-03 | 6.802  |
| DHRS4                     | dehydrogenase/reductase (SDR family) member 4                                 | 1451559_a_at | 4.16E-04 | -1.384 |
| DMD                       | dystrophin                                                                    | 1417307_at   | 1.75E-03 | -1.362 |
| DSTN                      | destin (actin depolymerizing factor)                                          | 1417124_at   | 3.05E-03 | -1.532 |
| DTD1                      | D-tyrosyl-tRNA deacylase 1 homolog (S. cerevisiae)                            | 1451040_at   | 1.39E-03 | -1.419 |
| DUSP19                    | dual specificity phosphatase 19                                               | 1448922_at   | 1.96E-03 | -1.396 |
| DUSP4                     | dual specificity phosphatase 4                                                | 1428834_at   | 1.40E-03 | -1.475 |
| ECE2                      | endothelin converting enzyme 2                                                | 1424561_at   | 5.38E-04 | 1.477  |
| EFCA7                     | EF-hand calcium binding domain 7                                              | 1451349_at   | 4.05E-03 | -1.493 |
| EIF3E                     | eukaryotic translation initiation factor 3, subunit E                         | 1460432_a_at | 1.79E-03 | -1.276 |
| ELAVL1                    | ELAV (embryonic lethal, abnormal vision, Drosophila)-like 1 (Hu antigen R)    | 1440464_at   | 5.84E-04 | -6.986 |
| EPHA3                     | EPH receptor A3                                                               | 1455426_at   | 3.74E-04 | 1.294  |
| EPM2AIP1                  | EPM2A (laforin) interacting protein 1                                         | 1425624_at   | 2.29E-04 | -1.838 |
| ERAP1                     | endoplasmic reticulum aminopeptidase 1                                        | 1416942_at   | 4.33E-03 | -1.517 |
| ERI1                      | exoribonuclease 1                                                             | 1418827_at   | 4.36E-03 | -1.867 |
| ERO1L                     | ERO1-like (S. cerevisiae)                                                     | 1419029_at   | 4.72E-03 | -1.430 |
| ESCO1                     | establishment of cohesion 1 homolog 1 (S. cerevisiae)                         | 1424324_at   | 2.18E-04 | -6.056 |
| ESF1                      | ESF1, nucleolar pre-rRNA processing protein, homolog (S. cerevisiae)          | 1434942_at   | 3.12E-04 | -1.278 |
| ESF1                      | ESF1, nucleolar pre-rRNA processing protein, homolog (S. cerevisiae)          | 1453727_at   | 4.45E-03 | -1.799 |
| FAM2                      | Fas apoptotic inhibitory molecule 2                                           | 1455410_at   | 4.42E-03 | 1.498  |
| FAM189A1                  | family with sequence similarity 189, member A1                                | 1433945_at   | 3.83E-03 | 1.926  |
| FAM194A                   | family with sequence similarity 194, member A                                 | 1458320_at   | 5.65E-04 | -1.951 |
| FANCC                     | Fanconi anemia, complementation group C                                       | 1450861_at   | 1.60E-05 | -1.690 |
| FASN                      | fatty acid synthase                                                           | 1423828_at   | 1.31E-03 | 1.258  |
| FKBP9                     | FK506 binding protein 9, 63 kDa                                               | 1423677_at   | 1.02E-03 | -4.767 |
| FKBP9                     | FK506 binding protein 9, 63 kDa                                               | 1437687_x_at | 4.93E-03 | -3.196 |
| FLYWCH1                   | FLYWCH-type zinc finger 1                                                     | 1426982_at   | 3.87E-04 | 1.203  |
| FNDC3B                    | fibronectin type III domain containing 3B                                     | 1433833_at   | 2.16E-03 | 1.252  |
| FOXP4                     | forkhead box P4                                                               | 1429719_at   | 1.45E-04 | 1.258  |
| FOXP4                     | forkhead box P4                                                               | 1431088_at   | 1.78E-03 | 1.722  |
| FRMPD2                    | FERM and PDZ domain containing 2                                              | 1458506_at   | 1.97E-04 | -1.980 |
| FTL                       | ferritin, light polypeptide                                                   | 1418364_a_at | 1.63E-03 | 1.833  |
| FUT10 (includes EG:84750) | fucosyltransferase 10 (alpha (1,3) fucosyltransferase)                        | 1437388_at   | 3.29E-03 | -4.601 |
| FXDY7                     | FXDY domain containing ion transport regulator 7                              | 1419200_at   | 2.22E-03 | 1.433  |
| FZD6                      | frizzled homolog 6 (Drosophila)                                               | 1417301_at   | 3.35E-03 | -2.631 |
| G6PD                      | glucose-6-phosphate dehydrogenase                                             | 1422327_s_at | 1.13E-03 | -1.267 |
| GAS7                      | growth arrest-specific 7                                                      | 1417859_at   | 2.48E-03 | -1.752 |
| GCN1L1                    | GCN1 general control of amino-acid synthesis 1-like 1 (yeast)                 | 1433713_at   | 2.25E-03 | 1.544  |
| GLCC1                     | glucocorticoid induced transcript 1                                           | 1426218_at   | 3.71E-03 | 1.284  |
| GM10374                   | predicted gene 10374                                                          | 1436357_at   | 4.36E-03 | -1.394 |
| GM10397                   | predicted gene 10397                                                          | 1435740_at   | 1.02E-03 | 1.398  |
| GM11696                   | predicted gene 11696                                                          | 1458888_at   | 6.10E-04 | -1.613 |
| GM3579                    | predicted gene 3579                                                           | 1431214_at   | 1.88E-03 | -3.881 |
| GNA11                     | guanine nucleotide binding protein (G protein), alpha 11 (Gq class)           | 1434254_at   | 3.87E-03 | 1.289  |
| GN10                      | guanine nucleotide binding protein (G protein), gamma 10                      | 1450649_at   | 7.82E-04 | 1.259  |



|                             |                                                                                   |              |          |         |
|-----------------------------|-----------------------------------------------------------------------------------|--------------|----------|---------|
| GNPNAT1                     | glucosamine-phosphate N-acetyltransferase 1                                       | 1423158_at   | 3.26E-03 | -1.334  |
| GPI                         | glucose phosphate isomerase                                                       | 1434814_x_at | 3.03E-03 | 1.245   |
| GPR135                      | G protein-coupled receptor 135                                                    | 1441944_s_at | 9.08E-04 | -1.485  |
| GPR135                      | G protein-coupled receptor 135                                                    | 1459274_at   | 4.23E-03 | -1.446  |
| GRIA1                       | glutamate receptor, ionotropic, AMPA 1                                            | 1435239_at   | 1.95E-03 | 1.546   |
| GRK1                        | G protein-coupled receptor kinase 1                                               | 1421361_at   | 9.36E-04 | -72.593 |
| GSTM4                       | glutathione S-transferase mu 4                                                    | 1424835_at   | 4.74E-03 | -1.339  |
| GSTO1                       | glutathione S-transferase omega 1                                                 | 1456036_x_at | 2.09E-03 | 2.728   |
| GSTO1                       | glutathione S-transferase omega 1                                                 | 1416531_at   | 2.14E-03 | 1.904   |
| HGSNAT                      | heparan-alpha-glucosaminide N-acetyltransferase                                   | 1450868_at   | 3.76E-03 | -1.461  |
| HIST1H1C                    | histone cluster 1, H1c                                                            | 1436994_a_at | 5.34E-04 | 1.644   |
| HIST1H2BL                   | histone cluster 1, H2bl                                                           | 1455095_at   | 2.20E-04 | -1.631  |
| HIST3H2A                    | histone cluster 3, H2a                                                            | 1455712_at   | 3.32E-03 | -1.324  |
| HMGN5                       | high-mobility group nucleosome binding domain 5                                   | 1418152_at   | 4.54E-03 | -1.227  |
| HOMER2                      | homer homolog 2 (Drosophila)                                                      | 1424367_x_at | 2.38E-04 | 1.397   |
| HPS3                        | Hermansky-Pudlak syndrome 3                                                       | 1450647_at   | 3.03E-03 | -1.335  |
| HRASLS                      | HRAS-like suppressor                                                              | 1428991_at   | 2.68E-04 | -1.459  |
| HUNK                        | hormonally up-regulated Neu-associated kinase                                     | 1418260_at   | 4.01E-03 | 1.224   |
| IGFBP4                      | insulin-like growth factor binding protein 4                                      | 1437405_a_at | 4.82E-04 | 1.451   |
| IGFBP4                      | insulin-like growth factor binding protein 4                                      | 1437406_x_at | 2.32E-03 | 1.290   |
| IGSF3                       | immunoglobulin superfamily, member 3                                              | 1455049_at   | 3.13E-03 | 1.326   |
| IL6ST                       | interleukin 6 signal transducer (gp130, oncostatin M receptor)                    | 1452843_at   | 3.98E-03 | 1.282   |
| IQGAP1                      | IQ motif containing GTPase activating protein 1                                   | 1417380_at   | 7.27E-04 | 1.324   |
| IQSEC1                      | IQ motif and Sec7 domain 1                                                        | 1452327_at   | 6.29E-04 | 1.218   |
| IQSEC3                      | IQ motif and Sec7 domain 3                                                        | 1437912_at   | 8.97E-04 | 1.345   |
| ITGA6                       | integrin, alpha 6                                                                 | 1422444_at   | 1.45E-03 | 2.531   |
| KCNAB1                      | potassium voltage-gated channel, shaker-related subfamily, beta member 1          | 1448468_a_at | 1.86E-03 | -1.200  |
| KCND2                       | potassium voltage-gated channel, Shal-related subfamily, member 2                 | 1422834_at   | 8.62E-04 | 1.265   |
| KIAA1958                    | KIAA1958                                                                          | 1436852_at   | 4.35E-03 | 1.503   |
| KIRREL                      | kin of IRRE like (Drosophila)                                                     | 1434797_at   | 1.45E-03 | 1.442   |
| KLHDC10                     | kelch domain containing 10                                                        | 1433997_at   | 3.57E-03 | 1.240   |
| KLHL23                      | kelch-like 23 (Drosophila)                                                        | 1435743_at   | 4.72E-03 | -1.294  |
| KLHL36                      | kelch-like 36 (Drosophila)                                                        | 1425123_at   | 3.74E-03 | -1.658  |
| KLK2                        | kallikrein-related peptidase 2                                                    | 1425182_x_at | 4.01E-05 | 29.665  |
| KRT222                      | keratin 222                                                                       | 1457354_at   | 9.66E-04 | -1.473  |
| LAMP2                       | lysosomal-associated membrane protein 2                                           | 1434503_s_at | 2.15E-03 | 1.228   |
| LANCL3                      | LanC lantibiotic synthetase component C-like 3 (bacterial)                        | 1437268_at   | 1.43E-04 | 19.525  |
| LGALS4                      | lectin, galactoside-binding, soluble, 4                                           | 1451336_at   | 5.43E-04 | 3.480   |
| LOC100131261                | similar to hCG1728885                                                             | 1416186_at   | 4.42E-03 | -1.287  |
| LOC729505                   | hypothetical LOC729505                                                            | 1433507_x_at | 9.24E-04 | 1.571   |
| LRTM2                       | leucine-rich repeats and transmembrane domains 2                                  | 1433744_at   | 4.36E-03 | 1.404   |
| LTBP3                       | latent transforming growth factor beta binding protein 3                          | 1418049_at   | 4.06E-03 | 1.461   |
| LYNX1                       | LY6/neurotoxin 1                                                                  | 1441952_x_at | 2.09E-03 | -1.894  |
| LYPLAL1                     | lysophospholipase-like 1                                                          | 1451490_at   | 1.01E-03 | 1.816   |
| MAB21L2                     | mab-21-like 2 (C. elegans)                                                        | 1418934_at   | 2.27E-03 | 1.428   |
| MAF                         | v-maf musculoaponeurotic fibrosarcoma oncogene homolog (avian)                    | 1447849_s_at | 2.16E-03 | 1.368   |
| MALT1                       | mucosa associated lymphoid tissue lymphoma translocation gene 1                   | 1456429_at   | 3.45E-03 | 1.319   |
| MANEAL                      | mannosidase, endo-alpha-like                                                      | 1455202_at   | 3.41E-03 | -1.237  |
| MAP2K7                      | mitogen-activated protein kinase kinase 7                                         | 1457182_at   | 1.36E-03 | -9.381  |
| MAP7D2                      | MAP7 domain containing 2                                                          | 1431403_a_at | 1.77E-03 | -1.396  |
| MAPK8IP3                    | mitogen-activated protein kinase 8 interacting protein 3                          | 1425975_a_at | 2.72E-03 | 1.203   |
| MCCC2                       | methylcrotonoyl-Coenzyme A carboxylase 2 (beta)                                   | 1428021_at   | 2.32E-03 | -1.720  |
| MFAP1                       | microfibrillar-associated protein 1                                               | 1449444_a_at | 1.80E-03 | -1.331  |
| MGC42105                    | serine/threonine-protein kinase NIM1                                              | 1434297_at   | 2.07E-04 | -1.323  |
| MGLL                        | monoglyceride lipase                                                              | 1426785_s_at | 4.86E-03 | 1.575   |
| MICAL3 (includes EG:194401) | microtubule associated monooxygenase, calponin and LIM domain containing 3        | 1434221_at   | 1.79E-04 | 1.363   |
| MIOS                        | missing oocyte, meiosis regulator, homolog (Drosophila)                           | 1424803_at   | 2.89E-04 | 2.488   |
| MOGAT1                      | monoacylglycerol O-acyltransferase 1                                              | 1419504_at   | 2.54E-03 | -3.350  |
| MPHOSPH10                   | M-phase phosphoprotein 10 (U3 small nucleolar ribonucleoprotein)                  | 1429080_at   | 5.43E-04 | -1.246  |
| MPP5                        | membrane protein, palmitoylated 5 (MAGUK p55 subfamily member 5)                  | 1450113_at   | 1.52E-03 | -1.239  |
| MRPL45                      | mitochondrial ribosomal protein L45                                               | 1423492_at   | 4.30E-03 | -1.286  |
| MTHFS                       | 5,10-methylenetetrahydrofolate synthetase (5-formyltetrahydrofolate cyclo-ligase) | 1460257_a_at | 1.72E-03 | -1.363  |
| MTMR7                       | myotubularin related protein 7                                                    | 1447831_s_at | 1.67E-03 | -19.189 |
| MTRR                        | 5-methyltetrahydrofolate-homocysteine methyltransferase reductase                 | 1452110_at   | 8.64E-05 | 2.083   |
| MTUS1                       | microtubule associated tumor suppressor 1                                         | 1454824_s_at | 6.16E-04 | 1.639   |
| MYOF                        | myoferlin                                                                         | 1427318_s_at | 1.72E-04 | 2.179   |
| MYOM2                       | myomesin (M-protein) 2, 165kDa                                                    | 1457435_x_at | 2.13E-03 | 2.714   |
| NACC2                       | NACC family member 2, BEN and BTB (POZ) domain containing                         | 1429582_at   | 3.03E-03 | 1.294   |
| NAV2 (includes EG:78286)    | neuron navigator 2                                                                | 1435981_at   | 5.84E-04 | 2.063   |
| NDRG1                       | N-myc downstream regulated 1                                                      | 1420760_s_at | 3.85E-04 | 1.352   |
| NDST1                       | N-deacetylase/N-sulfotransferase (heparan glucosaminyl) 1                         | 1460436_at   | 1.91E-03 | 1.229   |
| NEGR1                       | neuronal growth regulator 1                                                       | 1456392_at   | 2.95E-03 | -1.239  |
| NEK3                        | NIMA (never in mitosis gene a)-related kinase 3                                   | 1418947_at   | 1.56E-03 | -3.326  |
| NFIX                        | nuclear factor IX (CCAAT-binding transcription factor)                            | 1436364_x_at | 1.63E-03 | 1.441   |
| NFIX                        | nuclear factor IX (CCAAT-binding transcription factor)                            | 1436363_a_at | 2.76E-03 | 1.393   |
| NHP2                        | NHP2 ribonucleoprotein homolog (yeast)                                            | 1416605_at   | 2.73E-03 | -1.295  |
| NLGN3                       | neuroligin 3                                                                      | 1436135_at   | 1.08E-03 | 1.549   |
| NME1                        | non-metastatic cells 1, protein (NM23A) expressed in                              | 1424110_a_at | 1.11E-03 | -2.224  |
| NOB1                        | NIN1/RPN12 binding protein 1 homolog (S. cerevisiae)                              | 1454957_at   | 2.97E-03 | -1.221  |
| NPH3                        | nephronophthisis 3 (adolescent)                                                   | 1433545_s_at | 1.72E-04 | -1.247  |
| NT5E                        | 5'-nucleotidase, ecto (CD73)                                                      | 1428547_at   | 6.86E-04 | -1.304  |
| NUDT19                      | nudix (nucleoside diphosphate linked moiety X)-type motif 19                      | 1432332_a_at | 2.96E-04 | 3.337   |
| NUDT19                      | nudix (nucleoside diphosphate linked moiety X)-type motif 19                      | 1434216_a_at | 7.10E-04 | 7.046   |
| NUP62                       | nucleoporin 62kDa                                                                 | 1415926_at   | 4.60E-03 | 1.972   |
| OCIA1                       | OCIA domain containing 1                                                          | 1424952_at   | 1.29E-03 | 3.339   |
| OCRL                        | oculocerebrorenal syndrome of Lowe                                                | 1438396_at   | 1.83E-04 | 1.209   |
| OMG                         | oligodendrocyte myelin glycoprotein                                               | 1418212_at   | 1.93E-03 | 1.250   |
| OPLAH                       | 5-oxoprolinase (ATP-hydrolysing)                                                  | 1424359_at   | 7.53E-04 | 1.272   |
| OPTN                        | optineurin                                                                        | 1435679_at   | 3.50E-04 | -1.341  |

|                              |                                                                                 |              |          |         |
|------------------------------|---------------------------------------------------------------------------------|--------------|----------|---------|
| OSBPL3                       | oxysterol binding protein-like 3                                                | 1438724_at   | 2.57E-04 | 4.146   |
| OSBPL6                       | oxysterol binding protein-like 6                                                | 1457881_at   | 2.22E-03 | 2.043   |
| OSMR                         | oncostatin M receptor                                                           | 1418674_at   | 3.56E-03 | 1.724   |
| P4HA2                        | prolyl 4-hydroxylase, alpha polypeptide II                                      | 1417149_at   | 5.59E-04 | 1.447   |
| PALM                         | paralemmin                                                                      | 1423967_at   | 3.36E-03 | 1.480   |
| PAQR4                        | progesterin and adipoQ receptor family member IV                                | 1423101_at   | 4.74E-03 | -1.360  |
| PCDHB12 (includes EG:56124)  | protocadherin beta 12                                                           | 1420443_at   | 1.69E-03 | 1.393   |
| PCDHB15                      | protocadherin beta 15                                                           | 1418941_at   | 3.96E-03 | 1.567   |
| PCNP                         | PEST proteolytic signal containing nuclear protein                              | 1452735_at   | 7.30E-04 | 1.583   |
| PCNXL2                       | pecanex-like 2 (Drosophila)                                                     | 1455559_at   | 1.04E-03 | 1.552   |
| PCOLCE                       | procollagen C-endopeptidase enhancer                                            | 1437165_a_at | 8.70E-05 | 2.191   |
| PCP2                         | Purkinje cell protein 2                                                         | 1424944_at   | 6.07E-04 | -2.580  |
| PEX11A                       | peroxisomal biogenesis factor 11 alpha                                          | 1419365_at   | 1.85E-03 | -1.228  |
| PFKFB2                       | 6-phosphofructo-2-kinase/fructose-2,6-biphosphatase 2                           | 1422091_at   | 2.03E-04 | -2.259  |
| PGAP2                        | post-GPI attachment to proteins 2                                               | 1424614_at   | 1.27E-03 | -1.458  |
| PGBD5                        | piggyBac transposable element derived 5                                         | 1460570_at   | 1.54E-04 | 1.339   |
| PGGT1B                       | protein geranylgeranyltransferase type I, beta subunit                          | 1438230_at   | 1.43E-03 | -1.934  |
| PHACTR4                      | phosphatase and actin regulator 4                                               | 1434258_s_at | 3.23E-03 | 1.438   |
| PHYHD1                       | phytanoyl-CoA dioxygenase domain containing 1                                   | 1428394_at   | 2.65E-03 | -1.280  |
| PIH1D1                       | PIH1 domain containing 1                                                        | 1452726_a_at | 8.79E-04 | -1.423  |
| PK3AP1                       | phosphoinositide-3-kinase adaptor protein 1                                     | 1429831_at   | 2.20E-03 | -4.017  |
| PISD                         | phosphatidylserine decarboxylase                                                | 1426387_x_at | 3.66E-03 | -2.420  |
| PLAGL1                       | pleiomorphic adenoma gene-like 1                                                | 1426208_x_at | 1.55E-04 | 1.280   |
| PLXNA3                       | plexin A3                                                                       | 1420996_at   | 2.99E-03 | 1.249   |
| PLXNA4                       | plexin A4                                                                       | 1441371_at   | 1.49E-03 | 1.377   |
| PLXNB1                       | plexin B1                                                                       | 1435254_at   | 3.86E-03 | 1.260   |
| PNPLA6                       | patatin-like phospholipase domain containing 6                                  | 1416517_at   | 1.76E-03 | 1.577   |
| POP4                         | processing of precursor 4, ribonuclease P/MRP subunit (S. cerevisiae)           | 1448419_at   | 1.90E-03 | -2.221  |
| PPIG                         | peptidylprolyl isomerase G (cyclophilin G)                                      | 1435341_at   | 4.13E-03 | -1.218  |
| PPM1L                        | protein phosphatase, Mg2+/Mn2+ dependent, 1L                                    | 1435787_at   | 1.28E-03 | 1.345   |
| PPP1R14C                     | protein phosphatase 1, regulatory (inhibitor) subunit 14C                       | 1417701_at   | 8.21E-04 | -2.419  |
| PPP1R3C                      | protein phosphatase 1, regulatory (inhibitor) subunit 3C                        | 1433691_at   | 1.09E-03 | 2.185   |
| PPP1                         | palmitoyl-protein thioesterase 1                                                | 1422467_at   | 1.41E-03 | 1.428   |
| PRPF31                       | PRP31 pre-mRNA processing factor 31 homolog (S. cerevisiae)                     | 1457083_at   | 2.64E-04 | -1.483  |
| PTOV1                        | prostate tumor overexpressed 1                                                  | 1416945_at   | 1.81E-03 | -1.685  |
| PTPN14                       | protein tyrosine phosphatase, non-receptor type 14                              | 1455359_at   | 2.42E-03 | 1.451   |
| PTPRF                        | protein tyrosine phosphatase, receptor type, F                                  | 1420843_at   | 4.08E-03 | -1.823  |
| PTTG1                        | pituitary tumor-transforming 1                                                  | 1424105_a_at | 2.13E-06 | 70.022  |
| PTTG1                        | pituitary tumor-transforming 1                                                  | 1438390_s_at | 2.85E-05 | 130.741 |
| QARS                         | glutamyl-tRNA synthetase                                                        | 1453237_at   | 1.54E-03 | -1.851  |
| RAI1                         | retinoic acid induced 1                                                         | 1453200_at   | 4.03E-03 | 1.367   |
| RAPGEF5                      | Rap guanine nucleotide exchange factor (GEF) 5                                  | 1455840_at   | 2.58E-03 | -1.646  |
| RBM45                        | RNA binding motif protein 45                                                    | 1437904_at   | 1.97E-03 | -12.899 |
| RBP3                         | retinol binding protein 3, interstitial                                         | 1457855_at   | 4.93E-03 | -1.206  |
| RBPMS                        | RNA binding protein with multiple splicing                                      | 1455936_a_at | 4.42E-03 | 2.459   |
| RCOR3 (includes EG:55758)    | REST corepressor 3                                                              | 1428343_at   | 1.02E-03 | 1.648   |
| RET                          | ret proto-oncogene                                                              | 1436359_at   | 2.04E-03 | 1.672   |
| RIOK1                        | RIO kinase 1 (yeast)                                                            | 1440893_at   | 3.22E-03 | -1.771  |
| RNASE4                       | ribonuclease, RNase A family, 4                                                 | 1422603_at   | 1.80E-03 | 1.358   |
| RNF144B                      | ring finger protein 144B                                                        | 1443252_at   | 3.46E-03 | -1.203  |
| RNF160                       | ring finger protein 160                                                         | 1452612_at   | 4.39E-03 | -1.263  |
| RNLS                         | renalase, FAD-dependent amine oxidase                                           | 1453180_at   | 3.40E-03 | -3.510  |
| RPAP3                        | RNA polymerase II associated protein 3                                          | 1448555_at   | 2.29E-03 | -1.244  |
| RPH3A                        | rabphilin 3A homolog (mouse)                                                    | 1434635_at   | 7.11E-04 | 1.331   |
| RPS6KA4                      | ribosomal protein S6 kinase, 90kDa, polypeptide 4                               | 1448498_at   | 4.47E-03 | 1.239   |
| RRM2B                        | ribonucleotide reductase M2 B (TP53 inducible)                                  | 1437222_x_at | 1.55E-03 | -2.199  |
| RWDD4A                       | RWD domain containing 4A                                                        | 1424243_at   | 2.32E-03 | 1.523   |
| RWDD4A                       | RWD domain containing 4A                                                        | 1457983_s_at | 2.57E-03 | 1.727   |
| SAMD14                       | sterile alpha motif domain containing 14                                        | 1454630_at   | 2.53E-03 | 1.273   |
| SAMD4A                       | sterile alpha motif domain containing 4A                                        | 1436356_at   | 4.94E-03 | 1.709   |
| SCGN                         | secretagogin, EF-hand calcium binding protein                                   | 1451534_at   | 1.79E-03 | 1.353   |
| SDCCAG8                      | serologically defined colon cancer antigen 8                                    | 1431203_at   | 1.51E-03 | -1.589  |
| SDF4                         | stromal cell derived factor 4                                                   | 1448367_at   | 2.37E-03 | -1.300  |
| SDK2                         | sidekick homolog 2 (chicken)                                                    | 1430425_at   | 3.78E-03 | 1.342   |
| SENP7                        | SUMO1/sentrin specific peptidase 7                                              | 1436860_at   | 3.49E-03 | 1.425   |
| SEPN1 (includes EG:57190)    | selenoprotein N, 1                                                              | 1426680_at   | 1.82E-03 | 1.696   |
| SERINC4                      | serine incorporator 4                                                           | 1426035_at   | 1.51E-04 | -1.316  |
| SH3RF1                       | SH3 domain containing ring finger 1                                             | 1445178_at   | 7.31E-04 | 1.544   |
| SHANK2                       | SH3 and multiple ankyrin repeat domains 2                                       | 1442823_at   | 1.91E-03 | 1.380   |
| SIDT2                        | SID1 transmembrane family, member 2                                             | 1426940_at   | 2.86E-03 | 1.235   |
| SIRT2                        | sirtuin (silent mating type information regulation 2 homolog) 2 (S. cerevisiae) | 1423507_a_at | 5.24E-04 | -1.554  |
| SKIV2L2                      | superkiller viralicidal activity 2-like 2 (S. cerevisiae)                       | 1447517_at   | 1.48E-04 | -28.664 |
| SLC25A32                     | solute carrier family 25, member 32                                             | 1453149_at   | 1.50E-03 | -1.782  |
| SLC26A7                      | solute carrier family 26, member 7                                              | 1436279_at   | 2.18E-03 | 1.829   |
| SLC2A3                       | solute carrier family 2 (facilitated glucose transporter), member 3             | 1455898_x_at | 2.61E-03 | 1.359   |
| SLC41A3 (includes EG:54946)  | solute carrier family 41, member 3                                              | 1425439_a_at | 1.12E-04 | -1.249  |
| SLC6A17 (includes EG:388662) | solute carrier family 6, member 17                                              | 1436137_at   | 1.33E-03 | 1.293   |
| SLC6A20                      | solute carrier family 6 (proline IMINO transporter), member 20                  | 1427221_at   | 1.32E-05 | 3.117   |
| SLC7A2                       | solute carrier family 7 (cationic amino acid transporter, y+ system), member 2  | 1436555_at   | 2.98E-03 | 1.969   |
| SLC7A3                       | solute carrier family 7 (cationic amino acid transporter, y+ system), member 3  | 1417022_at   | 3.15E-03 | -1.854  |
| SLC7A6OS                     | solute carrier family 7, member 6 opposite strand                               | 1429596_at   | 1.69E-03 | -1.263  |
| SLCQ3A1                      | solute carrier organic anion transporter family, member 3A1                     | 1448918_at   | 4.82E-03 | 1.655   |
| SMAD3                        | SMAD family member 3                                                            | 1454960_at   | 3.65E-03 | 1.535   |
| SMAD5                        | SMAD family member 5                                                            | 1451873_a_at | 2.29E-03 | -1.723  |
| SNAPC1                       | small nuclear RNA activating complex, polypeptide 1, 43kDa                      | 1429335_at   | 2.72E-03 | -1.574  |
| SORBS1                       | sorbin and SH3 domain containing 1                                              | 1425826_a_at | 5.27E-05 | 1.896   |
| SORD                         | sorbitol dehydrogenase                                                          | 1426584_a_at | 2.26E-03 | 1.281   |
| SPOCK1                       | sparc/osteonectin, cwcv and kazal-like domains proteoglycan (testican) 1        | 1419672_at   | 3.61E-03 | 2.226   |
| SPON1                        | spondin 1, extracellular matrix protein                                         | 1441226_at   | 1.23E-03 | 1.336   |

|                             |                                                                                 |              |          |         |
|-----------------------------|---------------------------------------------------------------------------------|--------------|----------|---------|
| SPON1                       | spondin 1, extracellular matrix protein                                         | 1442613_at   | 2.13E-03 | 1.668   |
| SSR1                        | signal sequence receptor, alpha                                                 | 1417764_at   | 4.59E-03 | 2.335   |
| STAT1                       | signal transducer and activator of transcription 1, 91kDa                       | 1440481_at   | 1.13E-03 | 1.486   |
| STIM1                       | stromal interaction molecule 1                                                  | 1448320_at   | 8.72E-04 | 1.267   |
| STK3                        | serine/threonine kinase 3 (STE20 homolog, yeast)                                | 1418512_at   | 2.65E-03 | -1.268  |
| STK35                       | serine/threonine kinase 35                                                      | 1439802_at   | 3.75E-03 | 1.288   |
| SURF6                       | surfeit 6                                                                       | 1416864_at   | 3.93E-03 | -1.312  |
| SYNJ2                       | synaptojanin 2                                                                  | 1452344_at   | 7.29E-05 | 1.216   |
| TALDO1                      | transaldolase 1                                                                 | 1425129_a_at | 2.02E-03 | -1.223  |
| TATDN3                      | TatD DNase domain containing 3                                                  | 1428769_at   | 1.68E-03 | -1.608  |
| TBCE                        | tubulin folding cofactor E                                                      | 1428282_at   | 8.31E-04 | -1.286  |
| TEAD1                       | TEA domain family member 1 (SV40 transcriptional enhancer factor)               | 1429556_at   | 1.61E-03 | 1.442   |
| TGM2                        | transglutaminase 2 (C polypeptide, protein-glutamine-gamma-glutamyltransferase) | 1455900_x_at | 3.01E-03 | 1.483   |
| THG1L                       | tRNA-histidine guanylyltransferase 1-like (S. cerevisiae)                       | 1432393_a_at | 4.62E-03 | -2.627  |
| TMM10                       | translocase of inner mitochondrial membrane 10 homolog (yeast)                  | 1417499_at   | 3.08E-03 | -1.256  |
| TMM44                       | translocase of inner mitochondrial membrane 44 homolog (yeast)                  | 1448801_a_at | 3.02E-03 | -1.230  |
| TM2D2                       | TM2 domain containing 2                                                         | 1456663_x_at | 3.46E-04 | -3.249  |
| TMEM132D                    | transmembrane protein 132D                                                      | 1446492_at   | 3.60E-04 | 1.203   |
| TMEM136 (includes EG:23530) | transmembrane protein 136                                                       | 1457701_at   | 2.19E-03 | -1.332  |
| TMEM158                     | transmembrane protein 158 (gene/pseudogene)                                     | 1428074_at   | 2.69E-03 | -1.348  |
| TMEM20                      | transmembrane protein 20                                                        | 1435452_at   | 1.84E-03 | -1.923  |
| TMEM201                     | transmembrane protein 201                                                       | 1454868_at   | 1.69E-03 | 1.247   |
| TMEM30A                     | transmembrane protein 30A                                                       | 1448339_at   | 6.11E-05 | -1.257  |
| TMEM60                      | transmembrane protein 60                                                        | 1428000_at   | 9.68E-04 | -1.240  |
| TMEM68                      | transmembrane protein 68                                                        | 1423649_at   | 6.23E-04 | 1.254   |
| TMEM70                      | transmembrane protein 70                                                        | 1424541_at   | 1.71E-03 | -1.215  |
| TMTC1                       | transmembrane and tetratricopeptide repeat containing 1                         | 1435261_at   | 1.19E-03 | 1.502   |
| TNK                         | TRAF2 and NCK interacting Kinase                                                | 1430579_at   | 9.50E-04 | 1.335   |
| TRM3                        | tropomyosin 3                                                                   | 1427260_a_at | 2.00E-03 | 1.256   |
| TRAPPC5                     | trafficking protein particle complex 5                                          | 1448999_at   | 8.54E-04 | -1.497  |
| TRIP10                      | thyroid hormone receptor interactor 10                                          | 1418092_s_at | 4.80E-03 | -1.491  |
| TRIP6                       | thyroid hormone receptor interactor 6                                           | 1449041_a_at | 2.54E-03 | 1.240   |
| TRNP1                       | TMF1-regulated nuclear protein 1                                                | 1453008_at   | 2.89E-03 | 1.204   |
| TRPS1                       | trichorhinophalangeal syndrome I                                                | 1434286_at   | 3.36E-03 | -1.381  |
| TSPAN6                      | tetraspanin 6                                                                   | 1416872_at   | 4.02E-03 | 1.428   |
| TTC28                       | tetratricopeptide repeat domain 28                                              | 1435456_at   | 5.16E-06 | 1.727   |
| TTL11                       | tubulin tyrosine ligase-like family, member 11                                  | 1430064_at   | 6.37E-04 | -1.435  |
| TTR                         | transthyretin                                                                   | 1459737_s_at | 1.40E-03 | 1.602   |
| TTR                         | transthyretin                                                                   | 1454608_x_at | 2.22E-03 | 1.711   |
| TUBE1                       | tubulin, epsilon 1                                                              | 1443481_at   | 7.26E-04 | -1.288  |
| UBE2F                       | ubiquitin-conjugating enzyme E2F (putative)                                     | 1429568_x_at | 6.34E-04 | -1.209  |
| UBLCP1                      | ubiquitin-like domain containing CTD phosphatase 1                              | 1429606_at   | 4.69E-03 | 3.165   |
| UBLCP1                      | ubiquitin-like domain containing CTD phosphatase 1                              | 1415790_at   | 4.97E-03 | -1.208  |
| UBXN4                       | UBX domain protein 4                                                            | 1426484_at   | 1.38E-05 | -1.244  |
| UEVLD                       | UEV and lactate/malate dehydrogenase domains                                    | 1455551_at   | 4.05E-03 | -2.574  |
| USH1C                       | Usher syndrome 1C (autosomal recessive, severe)                                 | 1450001_a_at | 1.19E-03 | -4.839  |
| UTP18                       | UTP18, small subunit (SSU) processome component, homolog (yeast)                | 1447266_at   | 3.72E-03 | -3.114  |
| VAV3                        | vav 3 guanine nucleotide exchange factor                                        | 1448600_s_at | 2.34E-03 | 1.514   |
| VPS36                       | vacuolar protein sorting 36 homolog (S. cerevisiae)                             | 1424417_at   | 1.61E-03 | -1.743  |
| VPS37A                      | vacuolar protein sorting 37 homolog A (S. cerevisiae)                           | 1429363_at   | 8.60E-04 | 2.165   |
| WDR60                       | WD repeat domain 60                                                             | 1436396_at   | 3.47E-03 | 1.770   |
| WDR78                       | WD repeat domain 78                                                             | 1434793_at   | 3.52E-03 | -1.823  |
| WWC2                        | WW and C2 domain containing 2                                                   | 1448611_at   | 1.37E-03 | -1.459  |
| YIPF4                       | Yip1 domain family, member 4                                                    | 1426417_at   | 3.40E-03 | -8.031  |
| ZDHHC17                     | zinc finger, DHHC-type containing 17                                            | 1458363_at   | 3.34E-03 | -1.388  |
| ZFP14                       | zinc finger protein 14 homolog (mouse)                                          | 1441619_at   | 4.37E-03 | -1.586  |
| ZFP36                       | zinc finger protein 36, C3H type, homolog (mouse)                               | 1452519_a_at | 3.27E-04 | 1.763   |
| ZFP36L2                     | zinc finger protein 36, C3H type-like 2                                         | 1437626_at   | 3.94E-03 | 1.470   |
| ZFP386                      | zinc finger protein 386 (Kruppel-like)                                          | 1451146_at   | 4.95E-03 | -2.177  |
| ZFP874                      | zinc finger protein 874                                                         | 1434171_at   | 2.13E-04 | -29.670 |
| ZNF259                      | zinc finger protein 259                                                         | 1419281_a_at | 4.04E-03 | -1.265  |
| ZNF26                       | zinc finger protein 26                                                          | 1444092_at   | 3.73E-04 | -30.101 |
| ZNF593                      | zinc finger protein 593                                                         | 1447703_x_at | 1.21E-03 | -1.948  |
| ZNF658                      | zinc finger protein 658                                                         | 1439181_at   | 6.61E-04 | -2.674  |
| ZNF780B                     | zinc finger protein 780B                                                        | 1440171_x_at | 4.11E-03 | 1.284   |
| ZNF99                       | zinc finger protein 99                                                          | 1442654_at   | 2.34E-03 | 2.447   |
| ZNF99                       | zinc finger protein 99                                                          | 1438491_x_at | 4.60E-03 | 1.291   |
| ZNHIT1                      | zinc finger, HIT type 1                                                         | 1425531_at   | 2.69E-03 | -1.224  |
| ZSWIM6                      | zinc finger, SWIM-type containing 6                                             | 1451819_at   | 4.43E-03 | 1.379   |
